# Supplementary material for: Computational discovery of spin-polarized semimetals in spinel materials
Source: Royal Society of Chemistry journal article supplement (doi:10.1039/d2ma00107a), 2022-01-01
Supplement: d2ma00107a1.pdf [file d2ma00107a1.pdf]

Electronic Supplementary Information for

## Computational discovery of spin-polarized semimetals in spinel materials

Shenda He,<sup>1,2</sup> Ruirong Kang,<sup>1,2</sup> Pan Zhou,<sup>1,\*</sup> Zehou Li,<sup>2</sup> Yi Yang,<sup>2,†</sup> and Lizhong Sun<sup>1,2</sup>

<sup>1</sup>Hunan Provincial Key laboratory of Thin Film Materials and Devices,  
School of Material Sciences and Engineering, Xiangtan University, Xiangtan 411105, China.

<sup>2</sup>School of Materials Science and Engineering, Xiangtan University, Xiangtan 411105, China.  
(Dated: April 27, 2022)

### I. INFORMATION OF ALL SPINELS CONSIDERED

Table S1: The lattice constants (Con.) and magnetic moments (Mag.) of all spinels considered. The presence of spin-polarized (FSP) or semimetal (Semi.) states around the Fermi level is also discussed (Y: Yes, N: No).

|                                                     |       | V         |                  |     |       | Co        |                  |     |       | Fe        |                  |     |       | Mn        |                  |     |       |
|-----------------------------------------------------|-------|-----------|------------------|-----|-------|-----------|------------------|-----|-------|-----------|------------------|-----|-------|-----------|------------------|-----|-------|
|                                                     |       | Cons. (Å) | Mag. ( $\mu_B$ ) | FSP | Semi. | Cons. (Å) | Mag. ( $\mu_B$ ) | FSP | Semi. | Cons. (Å) | Mag. ( $\mu_B$ ) | FSP | Semi. | Cons. (Å) | Mag. ( $\mu_B$ ) | FSP | Semi. |
| AB <sub>2</sub> O <sub>4</sub><br>oxide<br>spinel   | Ag    | 6.383     | 0.00             | N   | N     | 6.272     | 1.41             | N   | N     | 6.298     | 1.31             | N   | N     | 6.332     | 2.00             | Y   | N     |
|                                                     | Al    | 5.875     | 6.00             | Y   | N     | 5.782     | 6.00             | Y   | N     | 5.814     | 8.00             | N   | N     | 5.858     | 10.00            | Y   | N     |
|                                                     | Cd    | 6.405     | 0.00             | N   | N     | 6.370     | 10.00            | Y   | N     | 6.387     | 8.00             | Y   | N     | 6.384     | 6.00             | Y   | N     |
|                                                     | Cu    | 5.977     | 2.00             | Y   | N     | 5.904     | 0.43             | Y   | N     | 5.924     | 4.00             | Y   | N     | 5.951     | 2.00             | Y   | N     |
|                                                     | Ga    | 6.081     | 5.82             | N   | N     | 5.989     | 6.00             | N   | N     | 6.022     | 8.07             | N   | N     | 6.061     | 10.00            | Y   | N     |
|                                                     | Ge    | 6.335     | 2.00             | Y   | N     | 6.198     | 4.88             | Y   | N     | 6.264     | 8.00             | Y   | N     | 6.282     | 8.67             | N   | N     |
|                                                     | Hg    | 6.590     | 0.00             | N   | N     | 6.489     | 10.00            | N   | N     | 6.498     | 8.00             | Y   | N     | 6.508     | 6.00             | N   | N     |
|                                                     | In    | 6.478     | 4.25             | N   | N     | 6.404     | 6.00             | N   | N     | 6.416     | 8.46             | N   | N     | 6.469     | 10.00            | Y   | N     |
|                                                     | Ni    | 5.906     | 6.00             | Y   | N     | 5.819     | 2.00             | N   | N     | 5.848     | 4.00             | Y   | N     | 5.907     | 14.00            | N   | N     |
|                                                     | Ti    | 6.077     | 5.81             | N   | N     | 5.945     | 2.78             | N   | N     | 6.042     | 5.64             | N   | N     | 6.103     | 7.40             | N   | N     |
| Y                                                   | 6.588 | 6.00      | Y                | N   | 6.550 | 6.00      | Y                | N   | 6.560 | 8.00      | N                | N   | 6.514 | 10.00     | Y                | N   |       |
| Zn                                                  | 6.033 | 2.00      | Y                | Y   | 5.945 | 10.00     | Y                | N   | 6.010 | 8.00      | Y                | N   | 6.008 | 6.00      | Y                | N   |       |
| AB <sub>2</sub> S <sub>4</sub><br>sulfide<br>spinel | Ag    | 7.389     | 0.00             | N   | N     | 7.089     | 3.31             | N   | N     | 7.139     | 5.12             | N   | N     | 7.122     | 2.58             | N   | N     |
|                                                     | Al    | 7.224     | 6.00             | Y   | N     | 6.996     | 6.00             | Y   | N     | 7.023     | 8.00             | Y   | N     | 7.132     | 10.00            | Y   | N     |
|                                                     | Cd    | 7.643     | 2.00             | Y   | Y     | 7.206     | 4.39             | N   | N     | 7.263     | 8.100            | N   | N     | 7.366     | 6.00             | Y   | N     |
|                                                     | Ga    | 7.326     | 5.66             | Y   | N     | 7.063     | 6.00             | Y   | N     | 7.088     | 8.00             | Y   | N     | 7.073     | 9.91             | N   | N     |
|                                                     | Ge    | 7.485     | 3.46             | N   | N     | 7.083     | 4.48             | N   | N     | 7.017     | 7.37             | N   | N     | 7.257     | 8.27             | N   | N     |
|                                                     | Hg    | 7.650     | 2.00             | Y   | Y     | 7.181     | 4.25             | N   | N     | 7.221     | 8.02             | N   | N     | 7.277     | 6.00             | Y   | N     |
|                                                     | In    | 7.691     | 6.00             | Y   | N     | 7.270     | 6.00             | Y   | N     | 7.308     | 8.00             | Y   | N     | 7.431     | 10.00            | Y   | N     |
|                                                     | Ni    | 6.925     | 0.00             | N   | N     | 6.623     | 0.00             | N   | N     | 6.630     | 3.39             | N   | N     | 6.683     | 4.77             | N   | N     |
|                                                     | Ti    | 7.299     | 9.77             | Y   | N     | 7.018     | 2.88             | N   | N     | 7.053     | 8.63             | N   | N     | 7.174     | 10.00            | N   | N     |
|                                                     | Y     | 7.848     | 6.00             | Y   | N     | 7.350     | 6.00             | N   | N     | 7.385     | 8.14             | N   | N     | 7.416     | 10.00            | Y   | N     |
| Zn                                                  | 7.261 | 2.00      | Y                | N   | 6.923 | 4.19      | N                | N   | 7.049 | 8.00      | N                | N   | 7.143 | 6.00      | Y                | N   |       |

## II. MAGNETIC CONFIGURATIONS AND ELASTIC CONSTANTS

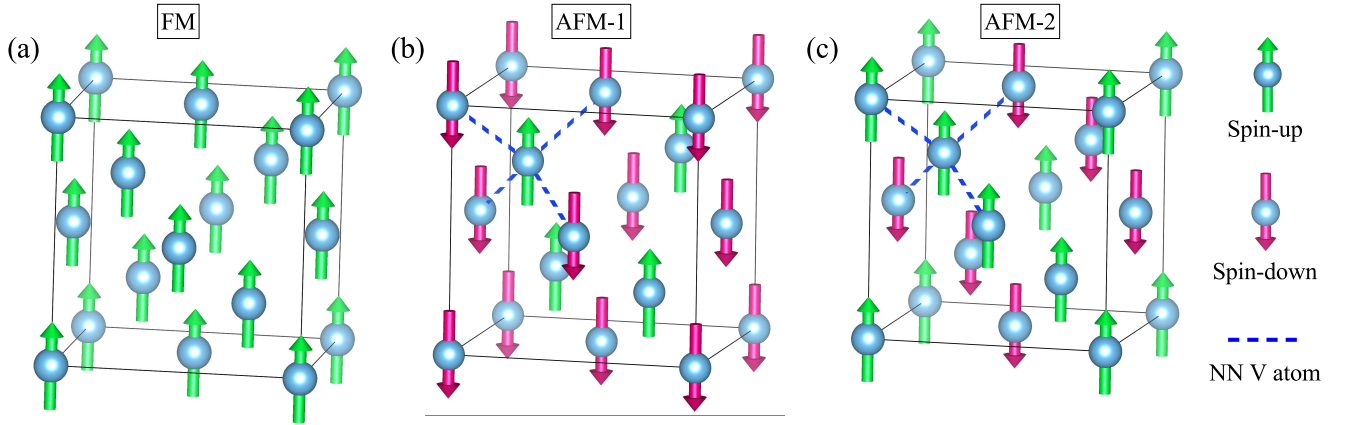

Figure S1: Illustrations of ferromagnetic and two types of antiferromagnetic configurations.

Table S2: Elastic constants  $C_{ij}$  (Gpa) of  $\text{VZn}_2\text{O}_4$  and  $\text{VCd}_2\text{S}_4$  at equilibrium lattice constant.

|                          | $C_{11}$ | $C_{12}$ | $C_{44}$ |
|--------------------------|----------|----------|----------|
| $\text{VZn}_2\text{O}_4$ | 255.30   | 153.06   | 69.47    |
| $\text{VCd}_2\text{S}_4$ | 97.96    | 54.81    | 22.31    |

### III. ORBITAL RESOLVED BANDS AND LOCAL GAP DISTRIBUTION OF $\text{VCd}_2\text{S}_4$

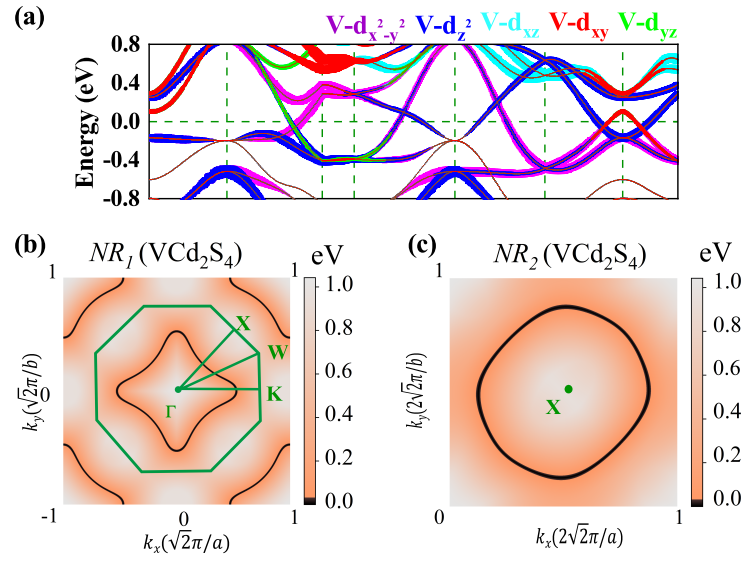

Figure S2: (a) Orbital resolved band structures of  $\text{VCd}_2\text{S}_4$ . (b) and (c) The local gaps between CBM and VBM of  $\text{VCd}_2\text{S}_4$  in the  $k_z=0$  and G-X-L planes, respectively.

## IV. EIGENVALUES OF SYMMETRY OPERATIONS

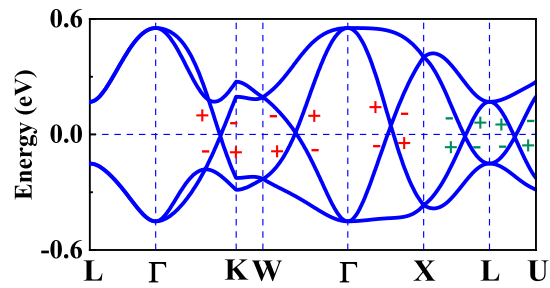

Figure S3: The enlarged band structures of  $VZn_2O_4$  near the  $E_f$  and the opposite eigenvalues ( $\pm 1$ ) under glide mirror operation  $G_z$  (red) and mirror operation  $G_{I01}$  (green).

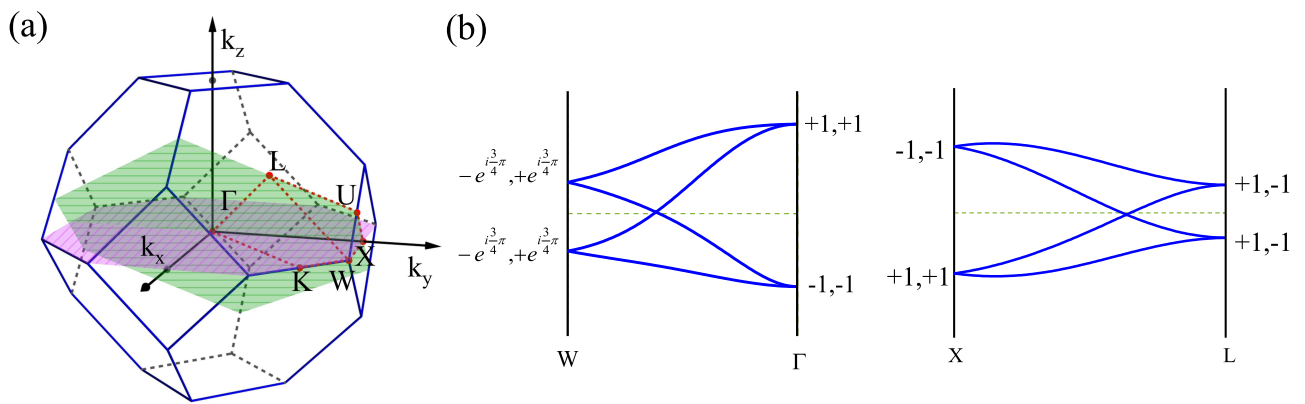

Figure S4: (a) Schematic diagram of invariant plane of  $G_z$  and  $G_{I01}$  in BZ (purple and green plane). (b) The four states' glide or mirror eigenvalues at four high symmetry points.

## V. BERRY PHASE OF TB MODEL

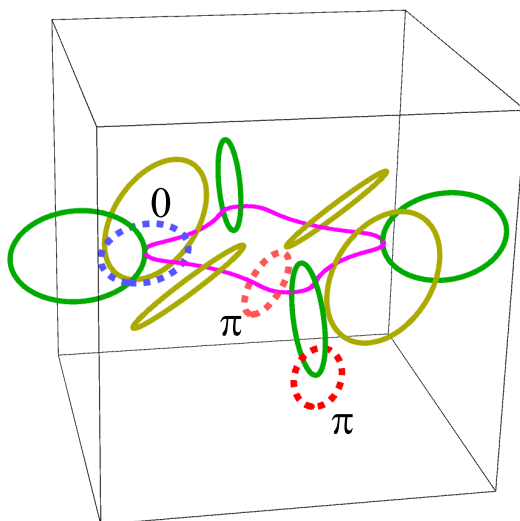

Figure S5: Schematic diagram of the values of Berry phase with different loops. The red and blue dotted loop, respectively, passes through one ring and two rings.

VI. ENERGY BAND STRUCTURES OF  $VZn_2O_4$  WITH DIFFERENT HUBBARD  $U$ , DIFFERENT STRAINS AND SOC

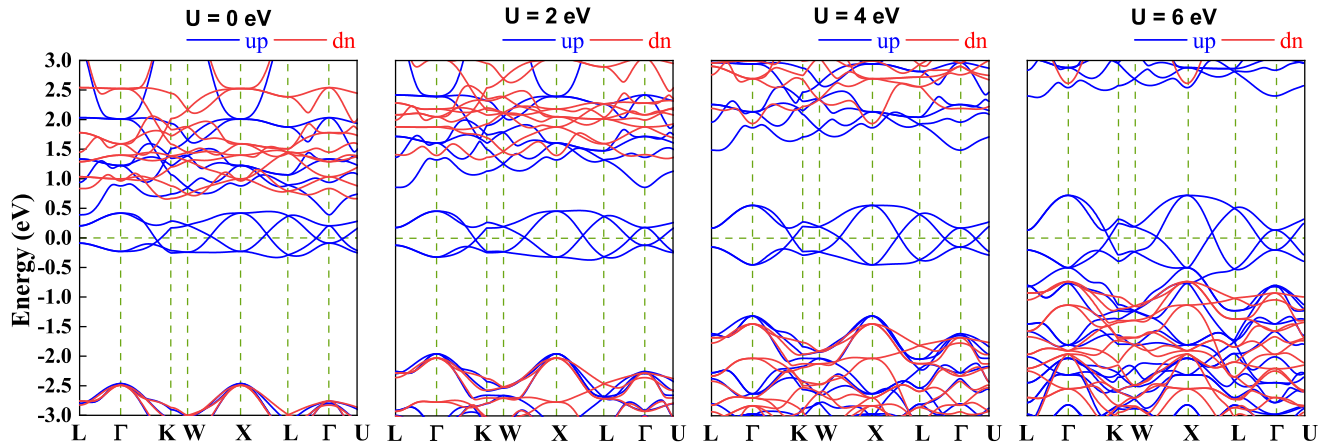

Figure S6: Band structures of  $VZn_2O_4$  with the  $U_{eff}$  ranging from 0 to 6 eV.

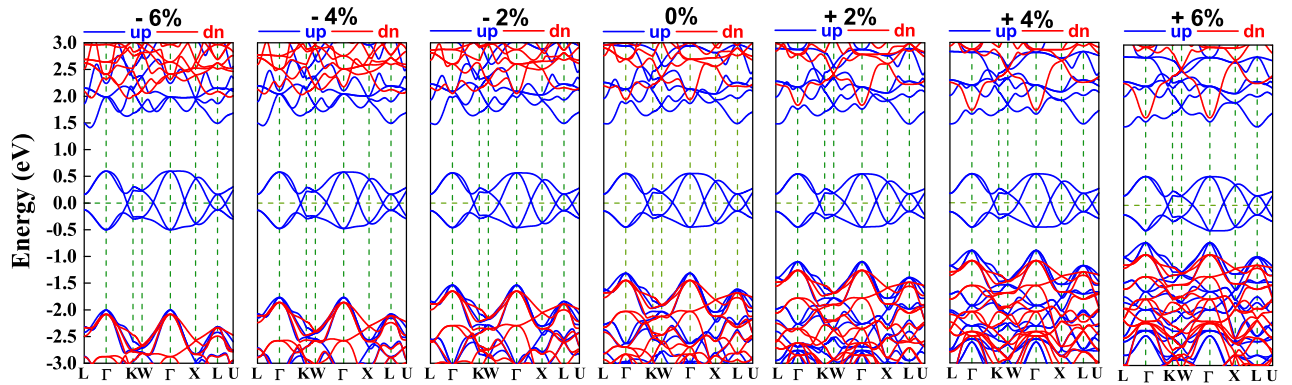

Figure S7: Band structures of  $VZn_2O_4$  with additional strains ranging from -6% to +6%.

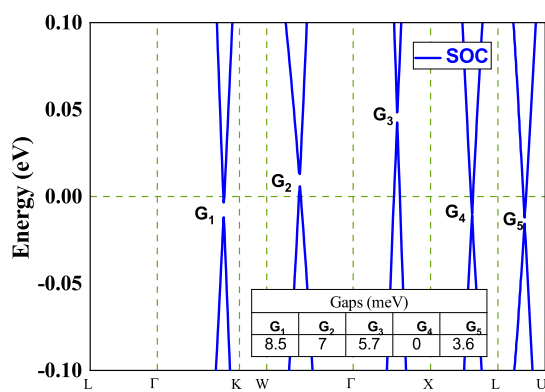

Figure S8: Band gaps with SOC for  $VZn_2O_4$ .

\* Electronic address: zhoupan71234@126.com

† Electronic address: yangyi@xtu.edu.cn
